# Supplementary material for: Importance and vulnerability of the world’s water towers
Source: Springer Nature journal article supplement (doi:10.1038/s41586-019-1822-y), 2019-12-09
Supplement: MOESM1 [file 41586_2019_1822_MOESM1_ESM.xlsx]

## Sheet: Sheet1
Overview of all supply indicators, supply index, demand indicators, demand index, and Water Tower Index. Explanations of all variables are provided in the Methods section and Extended Data Tables 3 and 4
WTU ID and Name		Supply indicators and sub-indicators, and Supply Index													Demand indicators and Demand Index					Water Tower Index
ID	Name	PT	PYV	PMV	P	ST	SYV	SMV	S	GS	GY	G	L	SI	DIRR	DIND	DDOM	DNAT	DI	WTI*
1	Mississippi - Missouri	0.13	0.66	0.47	0.07	0.39	0.01	0.72	0.14	0.02	0	0.01	0.08	0.08	0.79	0.31	0.3	0.885103	0.570996	0.20 ± 0.03
2	California	0.58	0.26	0.07	0.1	0.17	0.01	0.4	0.03	0.01	0	0	0.23	0.09	0.86	0.53	0.52	0.428732	0.586066	0.24 ± 0.02
3	Great Basin	0.61	0.29	0.12	0.13	0.12	0.01	0.37	0.02	0	0	0	0.91	0.26	0.11	0.06	0.05	0.593671	0.202776	0.24 ± 0.03
4	North America, Colorado	0.31	0.63	0.4	0.16	0.41	0	0.7	0.14	0.05	0	0.03	0.09	0.1	0.89	0.38	0.43	0.691987	0.598997	0.28 ± 0.04
5	Columbia and Northwestern United States	0.66	0.69	0.24	0.31	0.37	0.03	0.73	0.14	0.31	0.01	0.16	0.38	0.25	0.78	0.28	0.27	0.735341	0.514669	0.58 ± 0.06
6	Fraser	0.77	0.77	0.44	0.46	0.49	0.04	0.7	0.18	0.48	0.04	0.26	0.61	0.38	0.43	0.15	0.12	0.762096	0.36252	0.62 ± 0.07
7	Pacific and Arctic Coast	0.71	0.85	0.5	0.48	0.61	0.11	0.77	0.27	0.92	0.14	0.53	0.19	0.37	0.44	0.18	0.18	0.306663	0.278684	0.46 ± 0.09
8	Saskatchewan - Nelson	0.16	0.69	0.27	0.08	0.49	0.04	0.66	0.17	0.42	0.02	0.22	0.2	0.17	0.89	0.37	0.36	0.769282	0.599104	0.45 ± 0.07
9	Northwest Territories and Nunavut	0.3	0.68	0.23	0.14	0.83	0.29	0.94	0.51	0.99	0.33	0.66	0.48	0.45	0	0	0	0	0.000302101	0.00 ± 0.00
10	Hudson Bay Coast	0.38	0.77	0.25	0.2	0.67	0	0.82	0.28	0.01	0	0	0.29	0.19	0	0	0	0.567252	0.141813	0.12 ± 0.01
11	Atlantic Ocean Seaboard	0.44	0.68	0.46	0.25	0.63	0	0.86	0.27	0.01	0	0.01	0.52	0.26	0	0	0	0.130694	0.0326735	0.04 ± 0.03
12	Mackenzie	0.44	0.8	0.24	0.23	0.6	0.01	0.81	0.25	0.18	0.01	0.09	0.1	0.17	0.03	0.36	0.27	0.654678	0.328454	0.25 ± 0.05
13	Río Grande - Bravo	0.09	0.54	0.36	0.04	0.35	0	0.69	0.12	0	0	0	0.04	0.05	0.77	0.49	0.62	0.107753	0.498857	0.11 ± 0.04
14	Caribbean Coast	0.48	0.54	0.18	0.17	0	0.31	0.5	0	0.01	0	0	0	0.04	0.27	0.12	0.14	0.915751	0.362109	0.07 ± 0.01
15	Magdalena	0.64	0.72	0.46	0.38	0	0.2	0.41	0	0	0	0	0.01	0.1	0.07	0.04	0.05	0.565748	0.181642	0.08 ± 0.01
16	Orinoco	0.15	0.65	0.31	0.07	0	0.03	0.05	0	0	0	0	0.02	0.02	0.27	0.2	0.08	0.758165	0.328986	0.03 ± 0.01
17	Amazon	0.3	0.8	0.3	0.17	0.01	0.31	0.36	0	0.04	0	0.02	0.01	0.05	0.03	0.06	0.03	0.783668	0.226837	0.05 ± 0.01
18	La Plata	0.02	0.76	0.04	0.01	0	0.07	0.17	0	0	0	0	0	0	0.42	0.33	0.33	0.945443	0.507312	0.01 ± 0.00
19	South America, Colorado	0.3	0.54	0.42	0.14	0.23	0.09	0.5	0.07	0.54	0.04	0.29	0.01	0.13	0.72	0.46	0.26	0.186554	0.407038	0.24 ± 0.09
20	Negro	0.62	0.54	0.18	0.22	0.16	0.01	0.48	0.04	0.04	0	0.02	0.36	0.16	0.93	0.67	0.51	0.711454	0.707692	0.51 ± 0.06
21	South Argentina, South Atlantic Coast	0.38	0.65	0.69	0.26	0.21	0.15	0.62	0.08	0.94	0.22	0.58	0.19	0.28	0.8	0.43	0.39	0.140636	0.439017	0.55 ± 0.12
22	Colombia - Ecuador, Pacific Coast	0.51	0.78	0.56	0.34	0.01	0.12	0.45	0	0	0	0	0	0.09	0.32	0.13	0.12	0	0.142416	0.06 ± 0.01
23	Peru, Pacific Coast	0.96	0.62	0.09	0.34	0.01	0.26	0.33	0	0.1	0.01	0.06	0.02	0.1	0.27	0.32	0.31	0.665958	0.391454	0.19 ± 0.02
24	North Chile, Pacific Coast	0.73	0.47	0.36	0.3	0.11	0.06	0.4	0.03	0.43	0.03	0.23	0.04	0.15	0.6	0.48	0.43	0.431979	0.485038	0.33 ± 0.03
25	South Chile, Pacific Coast	0.81	0.68	0.64	0.53	0.24	0.09	0.67	0.09	0.82	0.12	0.47	0.25	0.34	0.82	0.41	0.44	0	0.418762	0.64 ± 0.05
26	La Puna Region	0.9	0.69	0.05	0.33	0.08	0.43	0.56	0.04	0.1	0.01	0.05	0.84	0.32	0.08	0.11	0	0.819023	0.253594	0.37 ± 0.04
27	Salinas Grandes	0.05	0.57	0.17	0.02	0.17	0.14	0.24	0.03	0.4	0.02	0.21	0.1	0.09	0.44	0.38	0.17	0.303512	0.323657	0.13 ± 0.07
28	Spain - Portugal, Atlantic Coast	0.04	0.57	0.45	0.02	0.02	0	0.06	0	0	0	0	0	0.01	0.69	0.27	0.29	0.0145769	0.314956	0.01 ± 0.00
29	Spain, South and East Coast	0.28	0.64	0.32	0.14	0.05	0	0.31	0.01	0	0	0	0.05	0.05	0.64	0.37	0.59	0.35232	0.488298	0.11 ± 0.03
30	Ebro	0.47	0.62	0.59	0.29	0.1	0	0.55	0.03	0	0	0	0.16	0.12	0.64	0.19	0.25	0.718641	0.449828	0.24 ± 0.06
31	Garonne	0.29	0.7	0.52	0.18	0.21	0	0.5	0.05	0	0	0	0.03	0.06	0.74	0.32	0.32	0.737959	0.52857	0.15 ± 0.03
32	France, West Coast	0.39	0.64	0.66	0.25	0.16	0	0.5	0.04	0	0	0	0	0.07	0.67	0.17	0.17	0.32709	0.336583	0.11 ± 0.03
33	Rhône	0.66	0.69	0.64	0.44	0.26	0.05	0.61	0.09	0.56	0.04	0.3	0.14	0.24	0.54	0.13	0.14	0.839622	0.412449	0.45 ± 0.07
34	France, South Coast	0.61	0.61	0.61	0.37	0.08	0	0.38	0.02	0	0	0	0.01	0.1	0.64	0.24	0.19	0.427261	0.375649	0.17 ± 0.03
35	Rhine	0.27	0.66	0.47	0.15	0.4	0.03	0.67	0.14	0.27	0.02	0.15	0.4	0.21	0.43	0.22	0.18	0.512186	0.33706	0.32 ± 0.11
36	Po	0.57	0.59	0.45	0.3	0.27	0.03	0.57	0.08	0.37	0.02	0.2	0.33	0.23	0.55	0.1	0.11	0.752627	0.378477	0.39 ± 0.07
37	Italy, West Coast	0.47	0.41	0.37	0.18	0.02	0	0.17	0	0	0	0	0	0.05	0.24	0.15	0.2	0.15446	0.184973	0.04 ± 0.01
38	Italy, East Coast	0.74	0.61	0.42	0.38	0.26	0.02	0.52	0.07	0.21	0.01	0.11	0.03	0.15	0.41	0.08	0.09	0.928955	0.377983	0.25 ± 0.05
39	Danube	0.39	0.65	0.61	0.25	0.25	0.01	0.53	0.07	0.08	0	0.04	0.06	0.11	0.89	0.26	0.27	0.666352	0.522256	0.25 ± 0.04
40	Sweden	0.19	0.69	0.56	0.12	0.64	0.02	0.81	0.26	0.35	0.01	0.18	0.49	0.27	0.16	0.06	0.05	0.0685643	0.0844169	0.10 ± 0.14
41	Adriatic Sea - Greece - Black Sea Coast	0.77	0.47	0.32	0.3	0.1	0	0.26	0.01	0	0	0	0.21	0.13	0.44	0.07	0.1	0.338441	0.236347	0.14 ± 0.03
42	Volga	0.06	0.63	0.42	0.03	0.49	0	0.71	0.17	0	0	0	0	0.05	0.92	0.37	0.39	0.669945	0.590566	0.14 ± 0.02
43	Ural	0.01	0.63	0.37	0.01	0.44	0	0.67	0.15	0	0	0	0	0.04	0.97	0.47	0.39	0.779866	0.652665	0.11 ± 0.01
44	Black Sea, North Coast	0.62	0.78	0.57	0.42	0.23	0.01	0.59	0.07	0.06	0	0.03	0	0.13	0.84	0.33	0.31	0.595525	0.517508	0.30 ± 0.04
45	Caspian Sea Coast	0.61	0.78	0.23	0.31	0.27	0.03	0.65	0.09	0.33	0.02	0.17	0.05	0.15	0.62	0.21	0.18	0.670278	0.420231	0.30 ± 0.05
46	Scandinavia, North Coast	0.84	0.68	0.62	0.55	0.56	0.02	0.82	0.24	0.43	0.02	0.22	0.39	0.35	0.01	0	0	0.158727	0.0452879	0.07 ± 0.08
47	Russia, Barents Sea Coast	0.08	0.71	0.36	0.04	0.67	0	0.81	0.27	0.01	0	0	0.01	0.08	0	0.11	0.06	0.508274	0.170834	0.06 ± 0.01
48	Arctic Ocean Islands	0.23	0.76	0.49	0.14	0.88	0.57	0.95	0.67	0.97	0.25	0.61	0.26	0.42	0	0	0	0	0	0.00 ± 0.00
49	Iceland	0.51	0.69	0.44	0.29	0.61	0.11	0.81	0.28	0.94	0.16	0.55	0.05	0.29	0	0	0	0.0153349	0.00461241	0.01 ± 0.02
50	Gobi Interior	0.39	0.76	0.09	0.16	0.29	0.03	0.81	0.12	0.45	0.02	0.24	0.07	0.15	0.82	0.48	0.33	0.179684	0.452997	0.30 ± 0.08
51	Yellow River	0.46	0.77	0.06	0.19	0.11	0.03	0.33	0.02	0.05	0	0.02	0.12	0.09	0.7	0.53	0.49	0.417024	0.536358	0.22 ± 0.05
52	Tarim Interior	0.83	0.8	0.09	0.37	0.2	0.22	0.72	0.09	0.85	0.04	0.45	0.16	0.27	0.92	0.69	0.56	0.839832	0.752556	0.91 ± 0.08
53	Tibetan Plateau	1	0.57	0.02	0.3	0.08	0.23	0.5	0.03	0.52	0.01	0.27	0.69	0.32	0	0	0	0	0	0.00 ± 0.00
54	Yangtze	0.43	0.88	0.07	0.21	0.13	0.09	0.55	0.04	0.23	0	0.12	0.1	0.12	0.22	0.2	0.17	0.768536	0.340117	0.18 ± 0.05
55	Mekong	0.09	0.81	0.06	0.04	0.2	0.04	0.47	0.05	0.16	0	0.08	0	0.04	0.51	0.42	0.39	0.578308	0.475353	0.10 ± 0.01
56	Salween	0.43	0.81	0.08	0.19	0.26	0.09	0.67	0.1	0.34	0.01	0.18	0.07	0.13	0.47	0.29	0.26	0.4699	0.371297	0.23 ± 0.04
57	Irrawaddy	0.14	0.71	0.08	0.05	0.16	0.13	0.69	0.07	0.02	0	0.01	0	0.03	0.59	0.38	0.42	0.34345	0.432545	0.07 ± 0.01
58	Ganges - Bramaputra	0.61	0.74	0.08	0.25	0.18	0.29	0.7	0.09	0.49	0.03	0.26	0.05	0.16	0.71	0.61	0.59	0.489874	0.598498	0.44 ± 0.05
59	Sabarmati	0.01	0.45	0.02	0	0	0	0.11	0	0	0	0	0	0	0.94	0.85	0.84	0.911636	0.886426	0.00 ± 0.00
60	Indus	0.71	0.7	0.25	0.34	0.33	0.16	0.67	0.13	0.87	0.09	0.48	0.22	0.29	0.91	0.69	0.59	0.843067	0.758315	1.00 ± 0.03
61	Lena	0.19	0.8	0.07	0.08	0.66	0.01	0.84	0.28	0.02	0	0.01	0.04	0.1	0.88	0.29	0.16	0.65253	0.494486	0.23 ± 0.04
62	Siberia, North Coast	0.14	0.6	0.15	0.05	0.72	0.01	0.85	0.31	0	0	0	0.26	0.16	0	0.02	0	0.393217	0.103835	0.07 ± 0.02
63	Yenisey	0.24	0.83	0.16	0.12	0.55	0	0.89	0.25	0	0	0	0.09	0.11	0.69	0.35	0.3	0.397746	0.435429	0.23 ± 0.07
64	Kara Sea Coast	0.03	0.69	0.36	0.02	0.68	0	0.74	0.25	0.01	0	0.01	0.04	0.08	0	0.05	0	0.929603	0.245475	0.09 ± 0.01
65	Ob	0.09	0.69	0.3	0.05	0.5	0.01	0.85	0.21	0.2	0.01	0.11	0.27	0.16	0.84	0.33	0.34	0.564243	0.518599	0.37 ± 0.06
66	Siberia, West Coast	0.41	0.84	0.3	0.23	0.65	0.01	0.82	0.27	0.11	0	0.05	0.07	0.16	0.46	0.08	0.03	0.370128	0.234098	0.17 ± 0.05
67	Black Sea, South Coast	0.56	0.78	0.69	0.41	0.24	0.01	0.61	0.08	0.19	0.01	0.1	0.04	0.16	0.62	0.13	0.17	0.218614	0.284141	0.20 ± 0.05
68	Caspian Sea, South West Coast	0.54	0.75	0.47	0.33	0.21	0	0.51	0.05	0.01	0	0.01	0.23	0.15	0.68	0.35	0.24	0.473747	0.435328	0.30 ± 0.04
69	Tigris - Euphrates	0.28	0.5	0.01	0.07	0.12	0	0.46	0.03	0.01	0	0	0.12	0.06	0.84	0.57	0.55	0.337028	0.575294	0.14 ± 0.02
70	Persian Gulf Coast	0.79	0.25	0.02	0.11	0	0.01	0.29	0	0	0	0	0.04	0.04	0.43	0.32	0.3	0.97397	0.50642	0.08 ± 0.01
71	Central Iran	0.31	0.42	0.11	0.08	0.08	0.02	0.34	0.01	0	0	0	0.33	0.11	0.62	0.21	0.34	0.251281	0.354428	0.17 ± 0.03
72	Helmand	0.68	0.33	0.03	0.12	0.13	0	0.46	0.03	0	0	0	0.09	0.06	0.45	0.67	0.3	0.755997	0.543999	0.15 ± 0.01
73	Farahrud	0.74	0.3	0	0.11	0.08	0	0.39	0.02	0	0	0	0	0.03	0.44	0.74	0.44	0.783582	0.599862	0.09 ± 0.01
74	Caspian Sea, East Coast	0.28	0.59	0.15	0.1	0.16	0	0.47	0.04	0	0	0	0.01	0.04	0.86	0.72	0.49	0.515588	0.644207	0.11 ± 0.01
75	Amu Darya	0.65	0.69	0.25	0.31	0.41	0.11	0.75	0.17	0.82	0.06	0.44	0.18	0.28	0.86	0.59	0.53	0.847135	0.705257	0.89 ± 0.07
76	Syr Darya	0.47	0.71	0.36	0.25	0.41	0.03	0.77	0.16	0.38	0.02	0.2	0.15	0.19	0.82	0.47	0.43	0.63671	0.589048	0.51 ± 0.05
77	Lake Balkash	0.43	0.71	0.23	0.2	0.43	0.05	0.83	0.19	0.58	0.04	0.31	0	0.18	0.57	0.28	0.18	0.41977	0.363941	0.29 ± 0.04
78	New Zealand	0.08	0.72	0.64	0.05	0.29	0.04	0.66	0.1	0.32	0.03	0.18	0.02	0.09	0.47	0.28	0.32	0	0.264869	0.11 ± 0.04
	*The uncertainty range is represented by the standard deviation of 1000 WTI calculations taking into account uncertainty in the input data. See Methods for details.
