# Supplementary material for: Importance and vulnerability of the world’s water towers
Source: Springer Nature journal article supplement (doi:10.1038/s41586-019-1822-y), 2019-12-09
Supplement: MOESM2 [file 41586_2019_1822_MOESM2_ESM..xlsx]

## Sheet: Sheet1
Overview of all vulnerability and future change indicators. Explanations of all variables are provided in the Methods section
WTU ID and Name		Vulnerability and future change indicators
ID	Name	BWS (-)	GE (-)	HT (-)	dGDP (%)	dPop (%)	dP WTU (%)	dP bas (%)	dT WTU (K)	dT bas (K)
1	Mississippi - Missouri	1.57126	1.55657	1	102.213	23.534	1.87553	1.9166	1.77638	1.85294
2	California	3.22955	1.5544	0	167.569	23.5444	0.0105961	-0.114402	1.53805	1.48952
3	Great Basin	2.25674	1.5544	0	126.204	23.5445	0.840311	1.07375	1.59954	1.62912
4	North America, Colorado	1.04689	1.5295	1	195.026	23.271	0.961453	0.546482	1.73036	1.7655
5	Columbia and Northwestern United States	1.00754	1.61863	1	150.272	24.0976	2.64044	2.44899	1.71807	1.71648
6	Fraser	0.0795657	1.8533	1	170.502	31.1424	4.09405	4.25607	1.75356	1.74964
7	Pacific and Arctic Coast	0.5455	1.64147	0	209.199	25.4537	7.50606	8.55619	2.04562	2.24311
8	Saskatchewan - Nelson	1.21604	1.85259	1	111.928	31.1687	3.53911	4.39708	1.81515	2.04303
9	Northwest Territories and Nunavut	0.706361	1.85421	0	22968.2	31.1174	9.98784	9.95419	2.29562	2.36582
10	Hudson Bay Coast	0.0335705	1.85421	0	713.72	30.9512	7.73114	7.73117	2.01801	2.02586
11	Atlantic Ocean Seaboard	7.45175e-05	1.85421	0	906.404	30.9945	5.61556	5.55174	1.86728	1.85473
12	Mackenzie	0.74217	1.85421	0	99.9301	30.9249	6.99803	6.82834	1.99669	2.10575
13	Río Grande - Bravo	3.52314	0.775188	1	175.509	23.0204	-0.184761	-1.79253	1.67998	1.59789
14	Caribbean Coast	0.564982	-0.344661	0	446.246	29.1599	-4.54305	-5.66059	1.33385	1.26609
15	Magdalena	0.148642	-0.0677764	0	384.934	28.1606	1.39406	0.23008	1.28207	1.28892
16	Orinoco	9.48937e-05	-0.682176	4	432.773	30.8284	0.940644	-2.46289	1.32399	1.39908
17	Amazon	0.145671	-0.219587	4	543.677	20.0351	2.41551	0.309351	1.41594	1.4669
18	La Plata	0.646287	-0.0809747	3	425.146	23.1884	-0.23168	2.15948	1.51672	1.1499
19	South America, Colorado	2.16008	0.161258	0	342.137	16.6408	-4.31438	-0.926527	1.24425	1.08031
20	Negro	0.862417	0.160876	0	368.547	16.641	-6.01586	-2.89429	0.99079	0.947022
21	South Argentina, South Atlantic Coast	1.28972	0.190015	0	373.091	16.3608	-0.687511	-1.36006	0.878989	0.898888
22	Colombia - Ecuador, Pacific Coast	0.792921	-0.236144	0	519.193	28.6378	3.57489	3.8006	1.17653	1.14898
23	Peru, Pacific Coast	2.87363	-0.134381	0	588.731	11.3861	2.07814	2.66585	1.38034	1.35104
24	North Chile, Pacific Coast	4.93173	0.848137	0	381.639	14.1598	-4.82495	-4.87886	1.32521	1.30578
25	South Chile, Pacific Coast	0.697555	0.770876	0	403.27	14.1957	-1.50929	-2.5454	0.851793	0.859459
26	La Puna Region	2.23355	0.00957631	0	739.415	23.9936	-0.775943	-1.44163	1.60893	1.61037
27	Salinas Grandes	1.32761	0.160126	0	401.877	16.595	-2.33964	-0.350073	1.48901	1.17707
28	Spain - Portugal, Atlantic Coast	1.97159	1.03777	0	99.6385	10.6887	-4.04041	-4.45716	1.20691	1.17134
29	Spain, South and East Coast	2.92183	1.03405	0	70.497	10.625	-4.24107	-3.42609	1.44269	1.36692
30	Ebro	2.96667	1.04151	2	95.7175	10.1005	-4.30102	-4.54893	1.42199	1.4664
31	Garonne	2.14094	1.34709	1	108.549	17.5152	-4.11769	-4.16793	1.44524	1.43732
32	France, West Coast	3.42757	1.34924	0	184.47	17.5404	-4.05844	-3.94094	1.21532	1.19242
33	Rhône	0.905991	1.43096	3	106.693	17.2299	-1.82672	-2.0279	1.45443	1.44678
34	France, South Coast	2.77128	1.31419	0	134.465	16.8964	-3.08637	-3.16053	1.41369	1.40462
35	Rhine	0.955801	1.77304	1	62.5911	1.54383	-0.165854	0.539147	1.45533	1.39418
36	Po	1.49796	0.593963	1	36.5427	1.60359	-0.981686	-1.20336	1.46597	1.46254
37	Italy, West Coast	2.8311	0.50242	0	62.0282	3.45179	-2.33928	-2.34721	1.39255	1.40724
38	Italy, East Coast	1.89018	0.510582	0	52.3518	-0.448711	-0.241269	-0.418348	1.48644	1.4855
39	Danube	0.704134	0.663628	2	127.184	-4.29147	-0.473913	-0.332252	1.47325	1.49533
40	Sweden	0.0654066	1.85215	0	163.281	26.8259	7.03453	5.41549	1.86233	1.88028
41	Adriatic Sea - Greece - Black Sea Coast	0.515348	0.258297	0	192.423	-2.52097	-1.93547	-1.96754	1.45094	1.4515
42	Volga	1.03989	-0.0765425	2	284.963	-3.95951	6.01171	5.59239	2.01299	2.0086
43	Ural	2.66258	-0.0406685	3	883.677	3.49364	6.35771	6.2905	1.99618	1.99715
44	Black Sea, North Coast	0.684335	-0.0696837	0	487.225	-4.22152	1.99349	2.06032	1.43355	1.44796
45	Caspian Sea Coast	0.8954	-0.0629546	3	400.05	-3.96403	0.852372	1.31572	1.52985	1.53171
46	Scandinavia, North Coast	0.01028	1.98044	0	112.306	35.5414	5.77489	5.86535	1.67449	1.76527
47	Russia, Barents Sea Coast	0.198069	-0.0776052	0	585.619	-4.23345	7.38966	7.90758	2.3605	2.44315
48	Arctic Ocean Islands	4.63952	0.807066	0	1306.63	-11.4113	12.3428	13.6326	2.20066	2.04495
49	Iceland	0	1.45067	0	198.207	40.7415	5.39336	4.99241	1.68329	1.6254
50	Gobi Interior	3.87907	0.135609	0	1256.04	-5.33894	6.6489	7.91945	1.78921	1.82202
51	Yellow River	1.80623	0.421908	0	1166.25	-7.4059	6.21533	6.21841	1.6927	1.66707
52	Tarim Interior	2.96268	0.401779	5	1075.02	-7.43779	6.4923	8.04696	1.77227	1.75581
53	Tibetan Plateau	1.97312	0.421908	0	2884.26	-8.58847	6.38819	6.39222	1.92327	1.92339
54	Yangtze	0.799227	0.421908	0	1090.61	-7.40321	6.15174	4.99465	1.75739	1.64514
55	Mekong	0.676197	0.0646266	3	963.381	9.72794	5.21893	3.45464	2.01833	1.43659
56	Salween	0.894002	0.08633	5	1336.29	-5.66345	5.2338	4.74965	1.91019	1.7
57	Irrawaddy	0.199002	-0.958161	5	861.477	0.0271	4.72762	4.74402	1.38458	1.29962
58	Ganges - Bramaputra	1.93551	0.0405762	3	1084.7	31.4602	4.38386	5.14521	1.70839	1.55015
59	Sabarmati	4.6734	-0.143266	0	1044.07	37.4047	4.70063	9.01578	1.59773	1.50388
60	Indus	2.21472	-0.361949	3	769.228	50.3045	0.236026	1.39548	1.87766	1.80046
61	Lena	0.296493	-0.0776052	0	408.301	-4.81041	8.44775	8.65379	2.15131	2.11828
62	Siberia, North Coast	0.932528	-0.0776052	0	571.988	-5.142	9.59653	10.5444	2.45995	2.73108
63	Yenisey	0.737971	-0.0962889	3	391.757	2.15612	7.41491	7.63229	2.06542	2.07301
64	Kara Sea Coast	0.518443	-0.0776052	0	1826.28	-6.01465	8.24336	8.92467	2.69713	2.86551
65	Ob	1.39276	-0.049524	4	304.785	0.167973	6.52153	7.12618	1.94222	2.14019
66	Siberia, West Coast	0.966311	-0.0776052	0	704.489	-4.87109	9.2872	10.4119	2.23866	2.34784
67	Black Sea, South Coast	2.48524	0.143506	0	384.592	15.7481	0.36877	-0.627924	1.44652	1.46168
68	Caspian Sea, South West Coast	3.41155	-0.0611223	2	421.812	9.98848	-1.53467	-1.82186	1.63148	1.65516
69	Tigris - Euphrates	3.17215	-0.709366	3	439.753	56.5441	-2.01401	-2.35379	1.72972	1.66761
70	Persian Gulf Coast	4.21774	-0.190952	0	452.248	18.2988	3.9789	3.61392	1.6666	1.6614
71	Central Iran	4.21083	-0.190952	0	308.057	18.3129	-0.238228	-0.527218	1.74162	1.73705
72	Helmand	4.07893	-1.30511	2	1941.18	101.77	-4.90333	-4.47318	1.87389	1.81902
73	Farahrud	4.70991	-1.09319	2	1065.17	73.1431	-4.6701	-3.56989	1.78596	1.76356
74	Caspian Sea, East Coast	4.43188	-0.99622	3	521.682	40.6487	-3.31665	-0.420803	1.77626	1.68992
75	Amu Darya	2.90078	-0.843025	3	1389.28	49.4949	-0.481472	1.27876	1.85317	1.78229
76	Syr Darya	3.21911	-0.210841	3	868.916	15.1035	3.18441	4.9216	1.75615	1.80575
77	Lake Balkash	0.907953	0.025071	3	740.617	9.60296	4.69828	6.40483	1.74266	1.8464
78	New Zealand	0.000677935	1.76622	0	175.553	27.4254	2.76651	2.16893	0.971226	0.967614
